# Comprehensive analysis of gene regulatory dynamics, fitness landscape, and population evolution during sexual reproduction

Kenji Okubo<sup>1,†,\*</sup> and Kunihiko Kaneko<sup>2,3,†</sup>

<sup>1</sup>Research Center for Integrative Evolutionary Science, The Graduate University for Advanced Studies

<sup>2</sup>Center for Complex Systems Biology, Universal Biology Institute, University of Tokyo

<sup>3</sup>Niels Nohr Institute, University of Copenhagen

<sup>†</sup>These authors contributed equally to this work.

\*Shonan Village, Hayama, Kanagawa 240-0193 Japan. [okubo@complex.c.u-tokyo.ac.jp](mailto:okubo@complex.c.u-tokyo.ac.jp)

## Abstract

The fitness landscape is a critical concept in evolutionary biology and genetics that depicts fitness in the genotype space and visualizes the relationship between genotype and fitness. However, the fitness landscape is challenging to characterize because the quantitative relationships between genotype and phenotype and their association to fitness has not been comprehensively well described. To address this challenge, we adopted gene regulatory networks to determine gene expression dynamics. We analyzed how phenotype and fitness are shaped by the genotype in two-gene networks. A two-by-two matrix provided the two-gene regulatory network in which a vector with two angle values ( $\Theta$ ) was introduced to characterize the genotype. Mapping from this angle vector to phenotypes allowed for the classification of steady-state expression patterns of genes into seven types. We then studied all possible fitness functions given by the Boolean output from the on/off expression of the two genes. The possible fitness landscapes were obtained as a function of the genetic parameters  $\Theta$ . Finally, the evolution of the population distribution under sexual reproduction was investigated in the obtained landscape. We found that the distribution was restricted to a convex region within the landscape, resulting in the branching of population distribution, including the speciation process.

**Keywords:** fitness landscape; gene regulatory network; sexual reproduction

## Introduction

The fitness landscape in evolutionary biology describes fitness as the height of the genotype space and intuitively visualizes the relationship between the genotype and fitness. The fitness landscape provides a significantly simplified picture of evolutionary biology and genetics and is relevant to study evolvability, evolutionary pathways, the effects of multiple mutations, and speciation.

However, it is difficult to obtain suitable fitness landscapes. In a fitness landscape, the genotype is represented by a set of parameters that can be mapped onto the fitness. According to the landscape, how fitness changes depends on the genetic parameters that are prescribed. However, there are two fundamental problems with this approach. It is necessary to determine the genetic parameters that describe landscape axes. Genetic information can be written as the DNA sequence and how continuous parameters are derived from this genetic sequence is not trivial because a slight change in the sequence could significantly change the phenotype. Therefore, the derivation of continuous and measurable genetic parameters that create the fitness landscape must be addressed. Second, fitness is a function of phenotype and is not computed from the genotype directly. Usually, the expression of RNAs and proteins is a complex and dynamic process that determines a resultant phenotype. In other words, the relationship between genotype and phenotype depends on complex gene expression dynamics. Fitness, then, is a

function of dynamically regulated phenotype.

We adopted gene regulatory networks (GRN) that describe gene expression dynamics to address these questions about the fitness landscape. First, we showed that the degree of activation or inhibition in expression dynamics continuously defines genotype parameters. Second, phenotypes, that is, protein expression levels, are determined by gene expression dynamics; whereas, genomes provide the gene regulatory network. Thus, a complex genotype–phenotype relationship was obtained. Then, fitness was defined by the phenotypes, and thus, represented as a function of the introduced genetic parameters. In fact, the evolution of GRN has been studied (Glass and Kauffman (1973); Mjolsness *et al.* (1991); Salazar-Ciudad *et al.* (2001, 2000); Kaneko (2006)) extensively with respect to the robustness or the phenotypic plasticity (Martin and Wagner (2009); Wagner (2013); Azevedo *et al.* (2006); Glass and Kauffman (1973); Mjolsness *et al.* (1991); Salazar-Ciudad *et al.* (2001, 2000); Kaneko (2006); Okubo and Kaneko (2021a,b); Kaneko (2007); Swain *et al.* (2002); Ou *et al.* (2008); Furusawa *et al.* (2005); Ayroles *et al.* (2015); Cubillos *et al.* (2014); Chapal *et al.* (2019); Miller *et al.* (2015); Kaneko and Kikuchi (2020); Nagata and Kikuchi (2020)).

While there are extensive studies of evolution in the fitness landscape (Soyer and Bonhoeffer (2006); Neyfakh *et al.* (2006); Ho and Zhang (2016); Orlenko *et al.* (2016); Yubero *et al.* (2017); Friedlander *et al.* (2017); Cuyppers *et al.* (2017); Orlenko *et al.* (2017); Schiffman and Ralph (2022); Hether and Hohenlohe (2014)), the relationship between the global fitness landscape and GRN

## 2 Comprehensive analysis of gene networks

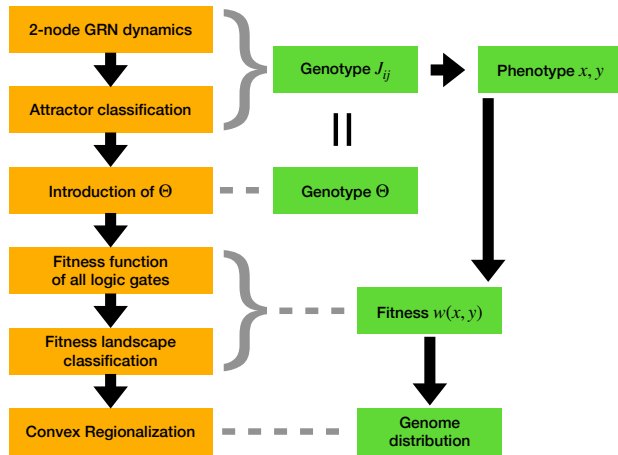

**Figure 1** A flow chart in this paper to obtain the genotype-phenotype relationship and fitness landscape.

1 structures remains uncharacterized. In particular, Heather and  
 2 Hohenlohe (Hether and Hohenlohe (2014)) classified GRN dy-  
 3 namics into six cases. However, the global change in gene ex-  
 4 pression dynamics due to GRN changes and the classification  
 5 of the fitness landscape need to be further investigated by com-  
 6 prehensively considering all classes of possible GRNs and their  
 7 relationship to phenotypes and fitness.

8 Generally, GRNs and their dynamic interactions with many  
 9 regulatory genes are too complex to analyze. Here, we consider  
 10 a GRN with two genes, which provides a straightforward and  
 11 basic system to study comprehensively the dynamics that cre-  
 12 ate a genotype-phenotype relationship. Here, two-node GRNs  
 13 are represented by  $2 \times 2$  matrices. By using on/off expression  
 14 dynamics, we could evaluate all the possible GRN structures by  
 15 introducing two-dimensional parameters specifying the matrix.

16 Still, there can be many types of fitness functions for given  
 17 expressions; in most theoretical studies, however, a specific fit-  
 18 ness function is selected depending on the purpose of the study.  
 19 Here, we studied all possible fitness functions that depended  
 20 on the expression of the two genes (i.e., Boolean functions). The  
 21 possible fitness functions were limited to 16 types, all of which  
 22 were investigated to obtain the possible fitness landscape. Once  
 23 the fitness landscape was obtained, the genome distribution of  
 24 the GRN parameter was computed. The distribution was  
 25 concentrated on a higher-fitness region; however, the robust-  
 26 ness against recombination or sexual reproduction (Martin and  
 27 Wagner (2009); Azevedo *et al.* (2006); Kim and Fernandes (2009);  
 28 Okubo and Kaneko (2021a); Omholt *et al.* (2000)) will impose  
 29 further restrictions on the genome distribution, as offspring from  
 30 the parent selected from the high-fitness region could fall into  
 31 a non-fitted region. Hence, it was crucial to determine how  
 32 stability against recombination shaped the genome distribution  
 33 depending on the fitness landscape.

34 This paper consists of two parts. The first part analyzes  
 35 the dynamics of the two-gene network and the second part  
 36 discusses the convex regionalization of the population by sexual  
 37 reproduction based on the fitness landscape. (See Fig.1 for the  
 38 flow used in this study).

39 In the first part, the phenotype and fitness are obtained from  
 40 the genotype in a two-gene network. Because the two-gene  
 41 network has only a few possible steady states, we classified these

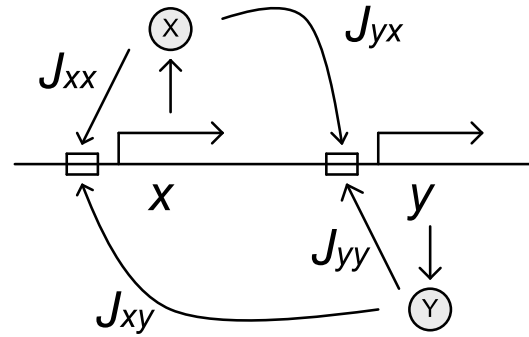

**Figure 2** Regulatory network of two genes. The arrows rep-  
 resent the transcribed regions and the boxes represent the  
 promoter regions. The mRNA is transcribed from each of the  
 X- and Y-transcribed regions, from which proteins X and Y are  
 synthesized. These proteins bind to the promoter regions of  
 the two genes and regulate their transcription. The transla-  
 tion is assumed to occur very quickly and is therefore, omitted  
 from this figure. Because proteins X and Y regulate genes  $x$   
 and  $y$ , there are four interactions. The magnitudes of these in-  
 teractions are indicated by  $J_{xx}$ ,  $J_{xy}$ ,  $J_{yx}$ , and  $J_{yy}$

42 steady states by introducing the angle vector  $\Theta = (\theta_x, \theta_y)$  from  
 43 the  $2 \times 2$  gene regulation matrix.  $\Theta$  provides the characteris-  
 44 tic parameters of the genotype. Next, we considered fitness as a  
 45 function of the on/off expression patterns to describe the fitness  
 46 landscape as a function of  $\Theta$ .

47 The second part discusses the evolution of population distri-  
 48 bution by sexual reproduction within all possible fitness land-  
 49 scapes. In particular, when the high-fitness region consisted  
 50 of two disjointed parts, we found that the speciation of the  
 51 two groups occurred by sexual recombination, whereas con-  
 52 vex regionalization from the non-concave fitted region was also  
 53 demonstrated. Finally, we discuss the relationship between the  
 54 fitness landscape and the convex regionalization of epistasis,  
 55 sexual reproduction, and speciation.

### Dynamics of the two-gene regulatory network and fitness landscape

#### Two-gene regulatory network model

58 Our two-gene regulatory networks model assumed that there  
 59 were two genes X and Y. Let  $x$  and  $y$  be the concentrations of  
 60 proteins transcribed and translated from each gene, respectively  
 61 Fig.2. Proteins X and Y are produced from the transcription of  
 62 genes X and Y, respectively, and bind to the promoter regions of  
 63 X and Y (represented by the squares on the line in Fig.2. When  
 64 proteins X and Y bind to a gene promoter, they either promote or  
 65 inhibit transcription of that gene. When protein X regulates the  
 66 transcription of gene X, the degree of regulation is represented  
 67 by  $J_{xx}$ . Similarly, the regulation of gene X by Y is represented  
 68 by  $J_{yx}$ , regulation of gene Y by X by  $J_{xy}$ , and regulation of gene Y  
 69 by Y by  $J_{yy}$ . These are collectively denoted by  $J_{ij}$ . The value of  $J_{ij}$   
 70 can take any real value; thus, when  $J_{ij}$  is positive, transcription  
 71

1 is promoted, and when  $J_{ij}$  is negative, it is inhibited.

2 When a protein binds to a promoter, gene transcription is  
3 promoted or inhibited. For simplicity, we assumed that a gene is  
4 transcribed when the sum of the effects of molecular regulation  
5 exceeds a threshold value. The activation function was given by  
6 the sigmoid function  $f[x] = \frac{1}{1+\exp[-\beta x]}$ . The degree by which  
7 gene  $m$  expression is regulated by protein  $N$  transcribed by gene  
8 are reported by  $n$  as  $J_{mn}$ , with the dynamics of the expression  
9 level and protein concentration of  $X$  and  $Y$  represented by

$$\dot{x} = f[J_{xx}(x - \zeta) + J_{xy}(y - \zeta)] - x \quad (1)$$

$$\dot{y} = f[J_{yx}(x - \zeta) + J_{yy}(y - \zeta)] - y \quad (2)$$

10  $-x$  and  $-y$  on the right-hand side of the second term represent  
11 protein  $X$  and  $Y$  degradation, respectively. Here, the expres-  
12 sion threshold was set at 0.5, to make the expression and non-  
13 expression states symmetric for later fitness function simplicity.  
14  $\beta$  of the sigmoid function was set to 100 to make the Hill function  
15 ( $f[x] = \frac{x^n}{K^n + x^n}$ ) sharp.

## 16 **Attractors of gene-expression dynamics**

17 Considering the relationship between genotype and phenotype,  
18 we focused on where the expression levels  $x$  and  $y$  converged  
19 to a fixed point or cycle. We investigated how phenotype  $(x, y)$   
20 was determined depending on the genotype,  $J_{ij}(i, j = x, y)$ .

21 To investigate the fixed point, we first obtained the nullclines  
22 of  $x$  and  $y$ , respectively, which were curves that satisfied  $\dot{x} = 0$  or  
23  $\dot{y} = 0$  in Eq.(2). The nullclines were represented by the equation:

$$x = f[J_{xx}(x - \zeta) + J_{xy}(y - \zeta)] \quad (3)$$

$$y = f[J_{yx}(x - \zeta) + J_{yy}(y - \zeta)], \quad (4)$$

24 which are illustrated in Fig.3. Since  $\beta \gg 1$ ,  $f[x]$  approaches  
25 a step function, so that  $x = f[x]$  is satisfied either at  $x \approx 1$  or  
26  $x \approx 0$ , as well as  $x \approx \zeta = 0.5$ . In this paper, for simplicity, these  
27  $x \approx 1$  and  $x \approx 0$  states are written as just  $x = 1$  and  $x = 0$   
28 considering  $\beta \gg 1$ .

## 29 **Classification of two-gene expression dynamics by at- 30 tractors**

31 For given gene regulatory networks, phenotypes determined by  
32 attractors in gene expression dynamics can be organized into  
33 seven classes (Fig.4). The attractor types, their numbers, and  
34 their configurations are classified based on the value of  $J_{ij}$  as  
35 follows:

- 36 1. Equal expression level of  $x, y$  (S, symmetric or synchron-  
37 ized)  
38  $x = 1, y = 1$ , or  $x = 0, y = 0$  is the fixed-point attractor  
39 depending on the initial conditions. We referred to this as  
40 dynamics-type-S.
- 41 2. Different expression level of  $x, y$  (A, antagonistic)  
42  $x = 1, y = 0$  or  $x = 0, y = 1$  is the fixed-point attractor  
43 depending on the initial conditions. We referred to this  
44 dynamic as type-D.
- 45 3. Same or different expression level of  $x, y$  (Q, quad)  
46 All possible four cases with  $x = 0$  or  $1, y = 0$  or  $1$  give  
47 the fixed-point attractor depending on the initial conditions  
48 and were referred to as dynamics-type-Q.

4. Intermediate expression level of  $x$  (Cx, continuous for  $x$ ) 49  
 $x = \alpha, y = 0$  or  $x = \alpha, y = 1$  is the fixed-point attractor, 50  
where  $0 < \alpha < 1$ , depending on the initial conditions and 51  
were defined as dynamics-type-Cx. 52

5. Intermediate expression level of  $x$  (Cy, intermediate for  $y$ ) 53  
 $x = 0, y = \alpha$  or  $x = 1, y = \alpha$  is the fixed-point attractor, 54  
where  $0 < \alpha < 1$ , depending on the initial conditions. We 55  
defined this a dynamics-type-Cy. 56

6. Half expression level for  $x, y$  (H, half) 57  
 $x = 0.5$  and  $y = 0.5$  is the fixed-point attractors that were 58  
observed all initial conditions were defined as dynamics- 59  
type-H. 60

7. Periodic expression  $x, y$  (P, periodic) 61  
When the limit cycle was obtained in all initial conditions, 62  
we referred to this as dynamics-type-P. 63

## 64 **Introduction of $\Theta$**

65 We were able to classify steady states that corresponded to phe-  
66 notypes and introduced a vector that characterized the genotype.  
67 Originally, the genotype in the model was represented by a  $J_{ij}$  in  
68 the  $2 \times 2$  real matrix. However, the GRN that adopted a sigmoid  
69 function only uses two states, 0, 1, beside 0.5, which reduced the  
70 dimension of the genotype. This two-dimensional parameter  
71 represented the genotype's declination angle,  $\Theta$ .

72 We then focused on the shape of the nullcline in Fig.3. The  
73 shape was determined by the direction of the line segment that  
74 passed through point (0.5,0.5), which determined the attractor.  
75 Therefore, the change in the dynamics were due to the change  
76 in  $J_{ij}$  and could be specified in the direction of normal vectors  
77 of the  $J_{ij}$  row vectors. When examining the direction of this line  
78 segment, one of the normal vectors of this line segment (Fig.3)  
79 pointed in the same direction as the row vector of  $J_{ij}$ , that is,  
80  $(J_{xx}, J_{xy})$  or  $(J_{yx}, J_{yy})$ . Here, only the direction of the row vectors  
81 mattered because the magnitude of the vectors was related to  
82 the shape of the nullcline. Hence, the shape of the nullcline was  
83 described by the angles of the  $J_{ij}$  ( $\Theta$ ) row vectors. In other words,  
84 as the angle between a line extended from the origin and the  
85 row vector,  $(J_{xx}, J_{xy})$  or  $(J_{yx}, J_{yy})$ , we could take advantage of  
86 the symmetry between  $x$  and  $y$  to define the counterclockwise  
87 angle between the positive part of the x-axis and  $(J_{xx}, J_{xy})$  as  $\theta_x$ ,  
88 and the counterclockwise angle between the positive part of the  
89 y-axis and  $(J_{yx}, J_{yy})$  as  $\theta_y$ . They were defined by

$$\theta_x = \arctan\left[\frac{J_{xy}}{J_{xx}}\right] \quad (5)$$

$$\theta_y = \arctan\left[\frac{-J_{yx}}{J_{yy}}\right]. \quad (6)$$

90 The dynamics and attractors were determined by using  $\Theta =$   
91  $(\theta_x, \theta_y)$

## 92 **$\Theta$ torus and attractor classification**

93 Using  $\theta_x$  and  $\theta_y$ , we could explicitly classify the attractors of the  
94 two-gene regulatory dynamics (Fig.4). This section introduces  
95 the  $\theta$  torus, which had a finite range of  $\theta_x$  and  $\theta_y$  and specified  
96 each attractor type.

97 First, the behavior of the gene expression dynamics was de-  
98 termined by the direction of the  $J_{ij}$ ,  $\Theta$  row vector. Here, the  
99 phenotype was visualized by introducing the  $\Theta$  torus with  $\theta_x$   
100 on the horizontal axis and  $\theta_y$  on the vertical axis, where  $\theta_x$  and

#### 4 Comprehensive analysis of gene networks

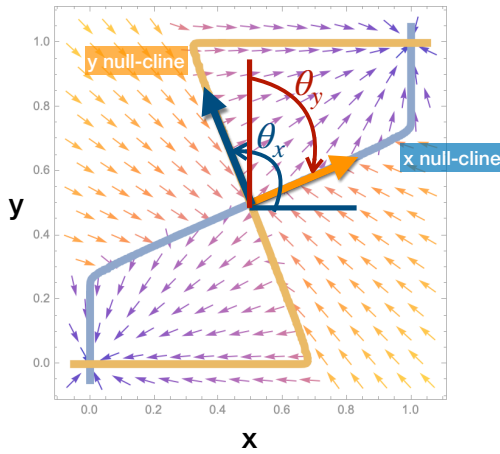

**Figure 3** Nullcline normal vector. First, the nullclines were obtained from  $\dot{x} = \dot{y} = 0$  in Eq.(1) and Eq.(2). The blue line represents the nullcline for  $x$  and orange that for  $y$ . The intersection of these two null lines was a fixed point. The shape of the nullcline was characterized by normal vectors that indicate the directions of the nullclines around  $(0.5,0.5)$  and are denoted as  $(J_{xx}, J_{xy})$  or  $(J_{yx}, J_{yy})$ . Furthermore, the vector field around the fixed point assisted in determining whether the fixed point was a stable fixed point (i.e., when the vector field around the fixed point was directed toward the fixed point from any direction) or an unstable fixed point (i.e., when the vector field around the fixed point is directed away from it). In this figure,  $(0,0)$ ,  $(0.5,0.5)$ , and  $(1,1)$  are nullcline intersections that are fixed points, whereas only  $(0,0)$  and  $(1,1)$  are stable fixed points and  $(0.5,0.5)$  is an unstable fixed point.

$\theta_y$  were cyclic with mod  $2\pi$ , as in Fig.4. Therefore,  $\Theta$  torus represented the attractor types. Each of the types (S, D, Q, Cy, Cx, H, and P) was characterized by the nullclines shown in Fig.4A. Note that  $\Theta$  determined the directions in the nullcline near point  $(0.5,0.5)$ . The attractor determined by the two nullclines could change depending on the relative positions of  $\theta_x$  and  $\theta_y$ . Then, S, D, Q, Cy, Cx, H, and P were classified depending on  $(\theta_x, \theta_y)$  as presented in Fig.4B. For the derivation of the boundaries for each classification, see Supplementary Material S1. This diagram shows the relationship from  $\Theta$  to the attractors in  $(x, y)$  and the one between genotype and phenotype.

#### Defining the fitness function

We obtained the fitness landscape for  $\Theta$  torus by first defining the fitness. Here, the phenotype was determined by the stationary expression levels of  $x$  and  $y$ . Here, we consider the case that the fitness takes maximal either at each expression level 0 or 1 (i.e., the fitness depends monotonically on the combination of each expression level, so that the fitness takes maximum at 0 or 1). Hence we focused on the states with values of 0 or 1; therefore, the fitness was described by a combination of the four-state input of  $(x, y) = (0,0), (0,1), (1,0), (1,1)$  and their two-state output. We assumed that binary fitness (fitted or non-fitted) was based on the binary phenotype. Hence, the fitness function was described by a Boolean (logical) function with two binary inputs and one binary output. In this case,  $2^4 = 16$  possible fitness degree functions existed, which were reduced to five fitness functions using the symmetry of the model and

identifying logical operations. (See Supplementary Material S2).

As for the fitness function  $w(x, y)$ , we introduced a continuous function to satisfy the Boolean function such that  $w(x, y)$  for  $x, y = (0, 1)$  was either 0 or 1, and determined that the simplest form for  $w(x, y)$  had intermediate values between 0 and 1. We characterized four typical fitness functions here. Other cases including NEUTRAL are described in Supplementary Material S3.

**AND: requires expression of both genes** This function used a maximum value of 1 when both  $x$  and  $y$  were set to 1.

$$w(x, y) = xy \quad (7)$$

This corresponded to the case where  $x$  and  $y$  expression was required for survival (e.g., the formation of complexes by the proteins X and Y).

**X ONLY: requires only X, whereas Y expression is neutral** In this function, fitness referred only to  $x$  and thus, if  $x$  was 1, fitness returned a maximum value of 1.

$$w(x, y) = x \quad (8)$$

This corresponded to the selection pressure affecting only the expression level of  $x$  (e.g., protein X is functionally dominant or protein Y had a neutral function). When the fitness depended only on the expression of  $y$ , it presented similarly to that of  $w(x, y) = y$ .

**XOR: requires the expression of only X or Y** When  $(x, y)$  was  $(1, 0)$  or  $(0, 1)$ , the fitness had a maximum value of 1. By contrast, when  $(x, y)$  was  $(0, 0)$  or  $(1, 1)$ , the fitness had a minimum value of 0. As the simplest form,

$$w(x, y) = |x - y|. \quad (9)$$

This function required that the expression of only one gene,  $x$  or  $y$ , was necessary for survival, but fitness was lost if both genes were expressed (e.g., switching the two pathways by the inputs).

**OR: requires the expression of either one of the two genes** If at least one of  $x, y$  is 1, then the fitness had a maximum value of 1.

$$w(x, y) = 1 - (1 - x)(1 - y) = x + y - xy \quad (10)$$

This corresponded to the case in which the expression of  $x$  or  $y$  was needed for survival (e.g., both X and Y proteins have similar functions).

#### Classification of the fitness landscape

We next explored the fitness landscape of genotype spaces that depended on the fitness function represented by  $\Theta$  torus. Here, for a given  $\Theta$ , we obtained the attractor of  $(x, y)$  for a fixed initial expression  $(x_0, y_0) = (0.05, 0.5)$  ( $(x_0, y_0) = (0.18, 0.18)$  for the XOR). Depending on the fitness function, we defined (AND, X ONLY, XOR, etc.) to obtain the fitness landscape for  $\Theta$ , as shown in the diagram presented in Fig.4B, which contains information about the complex genotype–phenotype relationship.

We defined four typical landscapes (ONE RECTANGLE, TWO RECTANGLES, L-SHAPE, and ONE BAND in Fig.5), as well as additional landscapes that are described in Supplementary Material S3.

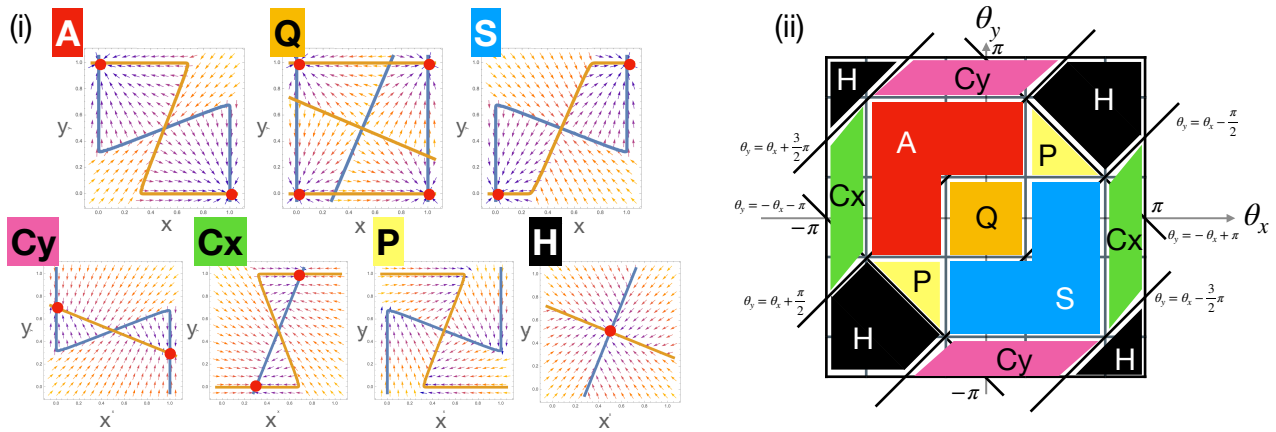

**Figure 4** Fixed point classification of the  $\Theta$  torus. (i) Each type of dynamics and nullclines in the two-gene regulatory network is represented. The  $\Theta$  values for each type in the figure are  $(-\frac{3}{8}\pi, \frac{3}{8}\pi)$  for (A),  $(-\frac{1}{8}\pi, -\frac{1}{8}\pi)$  for (Q),  $(\frac{3}{8}\pi, -\frac{5}{8}\pi)$  for (S),  $(-\frac{3}{8}\pi, \frac{7}{8}\pi)$  for (Cy),  $(\frac{7}{8}\pi, -\frac{3}{8}\pi)$  for (Cx),  $(\frac{3}{8}\pi, \frac{3}{8}\pi)$  for (P), and  $(\frac{7}{8}\pi, \frac{7}{8}\pi)$  for (H). (ii) Classification of each dynamic category was based on  $(\theta_x, \theta_y)$ . The boundaries between the categories in the figure are  $\theta_y = \theta_x \pm \frac{3}{2}\pi$ ,  $\theta_y = \theta_x \pm \frac{\pi}{2}$ ,  $\theta_y = -\theta_x \pm \pi$ ,  $\theta_y = \pm \frac{3}{4}\pi$ ,  $\theta_y = \pm \frac{1}{4}\pi$ ,  $\theta_x = \pm \frac{3}{4}\pi$ , and  $\theta_x = \pm \frac{1}{4}\pi$ , respectively.

1 **ONE RECTANGLE (seen in AND):** Fig.5(i) presents an example of  
 2 the "rectangle" landscape, where the region of maximum fitness  
 3 is in a single rectangle. This landscape is mainly observed in the  
 4 AND fitness function. The high-fitness region occurs only in the  
 5 parts of classes S and Q of the AND fitness because the optimal  
 6 fitness was achieved for only  $(x, y) = (1, 1)$ . In the  $\Theta$  space for  
 7 S in Fig.5(i) the maximum fitness is determined by the initial  
 8 expression  $(x_0, y_0)$ .

9 **TWO RECTANGLES (seen in X ONLY):** This fitness landscape  
 10 was composed of two rectangular high-fitness regions (Fig.5(ii))  
 11 where  $x = 1$  and  $y$  values were  $y = 1$  for one region and  $y = 0$   
 12 for the other. The fitness maximum was X ONLY when a stable  
 13 fixed point satisfied  $x = 1$ . The dynamics that satisfy this con-  
 14 dition were either S or D and the  $\Theta$  space for S and A in Fig.5(i)  
 15 reached the maximum fitness, which was determined by the  
 16 initial expression  $(x_0, y_0) = (0.05, 0.5)$ . Q achieved maximum  
 17 fitness, but all maximum fitness regions were connected.

18 **L-SHAPE (seen in XOR or OR):** The region of maximum fitness  
 19 was distributed in an L-shape, as shown in Fig.5(iii) with the  
 20 XOR fitness function. The shape of this landscape was an in-  
 21 verted L, which we collectively referred to as an L shape. This  
 22 landscape was obtained when the fitness function was either an  
 23 XOR or an OR. When using the XOR or OR fitness functions, the  
 24 initial condition  $(x_0, y_0)$  existed in  $0 \leq x_0 \leq 1$  and  $0 \leq y_0 \leq 1$ ,  
 25 except for the unstable fixed-point singularity. We found that  
 26 the region of L-SHAPE had the maximum fitness for all initial  
 27 conditions tested. Therefore, the fitness was always maximum  
 28 in the dynamics-type-A region because the stable fixed points of  
 29 dynamics-type-A were only  $(1, 0)$  and  $(0, 1)$ , respectively. The L-  
 30 shaped area was robust against noise in the expression or initial  
 31 conditions with XOR or OR fitness.

32 **ONE BAND (seen in OR or X ONLY):** The maximum fitness re-  
 33 gion was extended to the entire range of  $\theta_x$  or  $\theta_y$  as a band for the  
 34 OR fitness function, as shown in Fig.5(iv). This band extended  
 35 over the boundary of the  $\Theta$  torus in a single direction and there-  
 36 fore, the expression level of one  $x, y$  was neutral in this band. In

OR, fitness was maximized where  $x = 1$  or  $y = 1$ , which was  
 when a stable fixed point was reached and the dynamic types S,  
 D, Q, Cy, and Cx were satisfied. In particular, in dynamics-type-  
 D, the fitness of the OR was always maximally independent of  
 the initial condition because only the stable fixed points were  
 $(1, 0)$  and  $(0, 1)$ , and there were no other steady states. In S, Q, Cy,  
 and Cx, the maximum fitness regions were determined by the  
 initial expression  $(x_0, y_0)$ . Depending on the initial expression,  
 this type of landscape was also observed in the X ONLY fitness  
 landscape.

### Genotype distribution is restricted by evolution with sexual reproduction

Thus far, we have investigated the shape and features of the  
 fitness landscape by comprehensively calculating the correla-  
 tions between genotype, phenotype, and fitness in a two-gene  
 network. By introducing  $\Theta$  as a genotype parameter, we were  
 able to examine the phenotype and fitness for a given genotype  
 and obtain the global structure of the fitness landscape. Once we  
 have information on the global fitness landscape, we can predict  
 the gene distribution and evolvability of the population during  
 sexual reproduction and mutation. Thus, we investigated how  
 the population distribution of the gene parameter  $\Theta$  changed  
 through evolution, with or without sexual reproduction.

In particular, we focused on how the population distribution  
 was restricted to a convex set of maximum fitness regions by  
 evolution during sexual reproduction (i.e., convex regionaliza-  
 tion). We introduced asexual and sexual reproduction into this  
 model and numerically evolved the population distribution in  
 these conditions for each typical fitness landscape.

### Definition of mutation and recombination

Before discussing convex regionalization, we defined the pro-  
 cedure for genetic evolution. We considered two inheritance  
 modes: asexual and sexual reproduction processes. In asexual  
 reproduction, GRN  $J^{\text{new}}$  in the next generation was chosen from  
 a set of  $J^{\text{fit}}$  with high fitness in the population. For mutations,  
 the network adjacency matrix for the next generation,  $J^{\text{new}}$ , was

6 Comprehensive analysis of gene networks

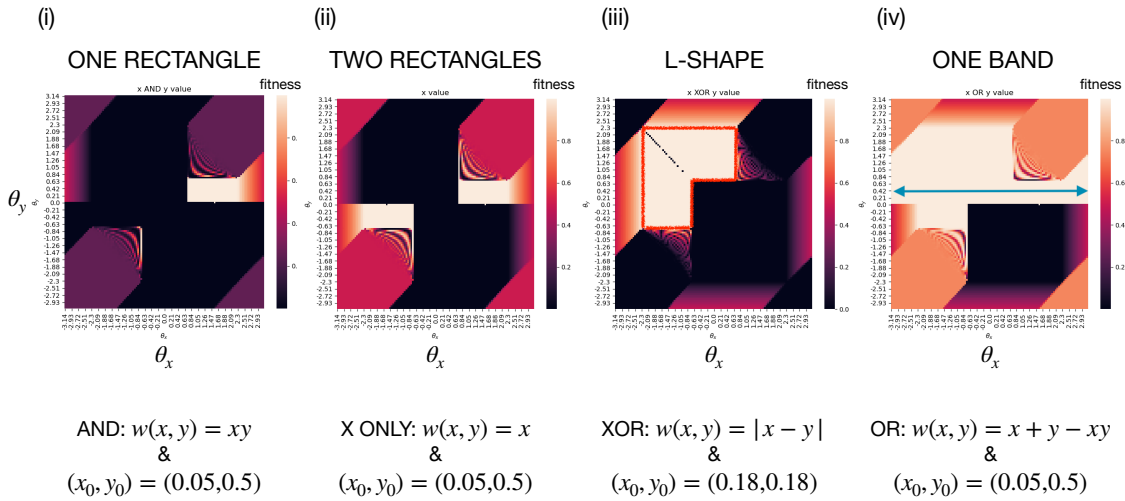

**Figure 5** Four typical landscapes. The fitness value is represented by a color plotted as a function of  $(\theta_x, \theta_y)$ . (i) A single rectangular region has maximum fitness. (ii) The maximum fitness region was divided into two parts. (iii) Even when the initial conditions were changed, the genotypes on the red line surrounding the region achieved maximum fitness. (iv) The arrowed band extends in the horizontal direction. If  $\theta_y$  is fixed in this range,  $\theta_x$  will be maximally fit for any value (neutral for  $x$ ).

changed by adding a random value generated by a normal distribution with mean 0 and variance  $\sigma$ . Note that the mutation was not introduced to  $\Theta$  but to  $J^{\text{new}}$ . This was because  $\Theta$  was an abstract characteristic value and not the actual value for simplicity. In sexual reproduction, two individuals,  $J^{\text{fit1}}$  and  $J^{\text{fit2}}$ , were selected from the set  $J^{\text{fit}}$  to generate high fitness. The GRN in the next generation was then defined by row-wise mixing of the two highly fitted individuals. Therefore,

$$\begin{pmatrix} J^{\text{fit1}}_{xx} & J^{\text{fit1}}_{xy} \\ J^{\text{fit2}}_{yx} & J^{\text{fit2}}_{yy} \end{pmatrix} \text{ or } \begin{pmatrix} J^{\text{fit2}}_{xx} & J^{\text{fit2}}_{xy} \\ J^{\text{fit1}}_{yx} & J^{\text{fit1}}_{yy} \end{pmatrix}$$

1 yields  $J^{\text{new}}$ . This corresponded to the recombination of the promoter or enhancer regions. The evolutionary change in regulatory regions is much faster than in the gene that encodes for the protein itself (Luscombe *et al.* (2004)). Because proteins can bind to gene promoter regions, it is appropriate to use row-by-row mixing of the GRN adjacency matrix  $J$  as a model for sexual reproduction with free recombination. In the  $\Theta$  torus, sexual reproduction could be expressed as parents with  $J^{\text{fit1}} : (\theta_x^{\text{fit1}}, \theta_y^{\text{fit1}})$  and  $J^{\text{fit2}} : (\theta_x^{\text{fit2}}, \theta_y^{\text{fit2}})$ , and with  $\theta_x^{\text{fit1}} \neq \theta_x^{\text{fit2}}$  and  $\theta_y^{\text{fit1}} \neq \theta_y^{\text{fit2}}$ . Additionally, suppose a rectangle with each side parallel to the  $\theta_x$  or  $\theta_y$  axis (Fig.6). By mixing the row vectors of the adjacency matrices with sexual reproduction, the children from  $(\theta_x^{\text{fit1}}, \theta_y^{\text{fit1}})$  and  $(\theta_x^{\text{fit2}}, \theta_y^{\text{fit2}})$  could be represented by  $(\theta_x^{\text{fit1}}, \theta_y^{\text{fit2}})$  or  $(\theta_x^{\text{fit2}}, \theta_y^{\text{fit1}})$ . This corresponded to the vertex of the other side of the diagonal compared to the parent in the rectangle of Fig.6. Mutations in sexual reproduction were introduced in the same way as asexual reproduction, in which a normal distribution with mean 0 and variance  $\sigma$  were added to  $J^{\text{new}}$ . Thus, sexual reproduction with a slight mutation could create a population of genotypes on the vertices of the rectangle.

**Convex regionalization of sexually reproducing populations from a non-convex fitted area**

For each fitness landscape category, we used simulations to examine changes in the population distribution due to sexual reproduction.

**Simulation method:** We ran simulations for 130 generations with a mutation size  $\sigma$  of 0.01 or 0.1, and a population size of 100. First, we set the initial expression to  $(x_0, y_0)$ . The initial expression  $(x_0, y_0)$  was fixed and did not change throughout the subsequent simulations. Each element of  $J_{ij}$  in the 0th generation was given a uniform random number in the interval  $[-1, +1]$ . The dynamics of the GRN were calculated using Eq.(1) and Eq.(2) for 100 time steps. The average of each  $x, y$  in the last ten steps was used as the phenotype (expression). Fitness was calculated from the phenotype using the function defined in the previous section.

**TWO RECTANGLES fitness landscape:** The difference in the distribution between the asexually and sexually reproducing populations in the simulation is shown in Fig.7. During asexual reproduction, the population remained distributed in both maximum-fitness regions. In contrast, the evolution during sexual reproduction was concentrated only on one of the two fitted rectangles. These results can be explained as follows. The TWO RECTANGLES fitness landscape had two regions with equal maximum fitness values. If a population was distributed across both, the offspring from the parent of the two rectangles fall onto the non-fitted region and the sexually reproducing population concentrated in one of the two regions was selected. Thus, the population distribution was in a convex region and sustained. In contrast, during asexual reproduction, the population was distributed across the two regions. Therefore, evolution of sexual reproduction could induce speciation. Here, the offspring from the two regions were less fit, resulting in hybrid sterility.

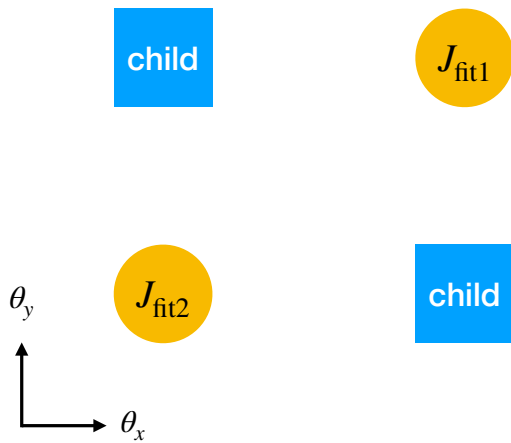

**Figure 6** Transfer of genetic parameters ( $\theta_x, \theta_y$ ) to children through recombination. Sexual reproduction involves mixing the row vectors of the adjacency matrix. The vector of children from the parents ( $\theta_x^{\text{fit1}}, \theta_y^{\text{fit1}}$ ) and ( $\theta_x^{\text{fit2}}, \theta_y^{\text{fit2}}$ ) were randomly chosen from  $\theta_x^{\text{fit1}}$  or  $\theta_x^{\text{fit2}}$ , and  $\theta_y^{\text{fit1}}$  or  $\theta_y^{\text{fit2}}$ . Graphically, two vertices can fall to a child on another diagonal from the parent rectangular axis.

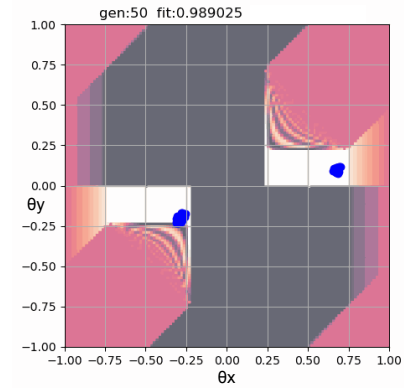

(a) asexual reproduction

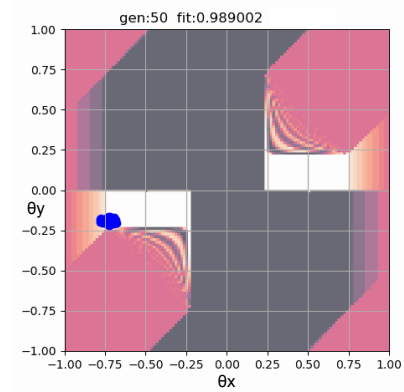

(b) sexual reproduction (right region is selected)

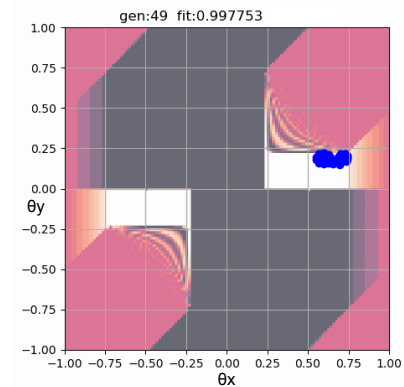

(c) sexual reproduction (right region is selected)

**Figure 7** Comparison of the population distributions in two rectangular fitness landscapes with X ONLY ( $w(x, y) = x$ ) fitness (a) during asexual reproduction (mutation only) or during sexual reproduction, where the population is branched into two cases, (b) and (c), which differ in each run of the evolution simulation. The initial expression was chosen as  $(x_0, y_0) = (0.05, 0.5)$ . The mutation rate was set to 0.01. "gen:" number is the generation number and "fit:" number is the average fitness of the population.

1 Following the definition of speciation by hybrid sterility, it can  
2 be concluded that speciation occurred in this case.

3 **L-SHAPE fitness landscape:** The difference in population distribu-  
4 tion between asexual and sexual reproduction was also ob-  
5 served in the L-SHAPE fitness landscape, as shown in Fig.8(iii).  
6 During asexual reproduction, the genotype population was  
7 spread over the entire L-shaped area of the landscape; how-  
8 ever, during sexual reproduction, the population was biased  
9 in one direction of the L-SHAPE. Here, the L-SHAPE fitness  
10 landscape (Fig.9) extended vertically and horizontally in two  
11 directions, but the offspring from the parent between these two  
12 directions (IV of Fig.9) were less fit as a result of the genetic  
13 change in Fig.6.

14 Hence, the offspring produced from sexual reproduction be-  
15 tween the two branches of the L-SHAPE landscape (II and III in  
16 Fig.9) shrank into a rectangular region, either vertically (I and III  
17 in Fig.9) or horizontally (I and II in Fig.9). Such convex region-  
18 alization of the population distribution did not occur during  
19 asexual reproduction. This convex regionalization was similar  
20 to speciation in the Bateson-Dobzhansky-Muller model (Bateson  
21 (1909); Dobzhansky (1936, 1937); Muller (1940, 1942)), which is  
22 supposed to be an L-shaped fitness landscape. However, we  
23 found that some individuals from the common square area (I  
24 in Fig.9) of the two edges maintained high fitness and were not  
25 reproductively isolated, indicating that complete speciation did  
26 not occur. Only some of the two rectangular regions (II and III  
27 in Fig.9) were not fit, as an offspring could be located in IV in  
28 Fig.9. However, this convex regionalization was achieved so that  
29 the population in the L-SHAPE region was not allowed under  
30 sexual reproduction.

### 31 Discussion

32 This study analyzed the genotype-phenotype relationship across  
33 all two-gene regulatory networks and obtained the fitness land-

8 Comprehensive analysis of gene networks

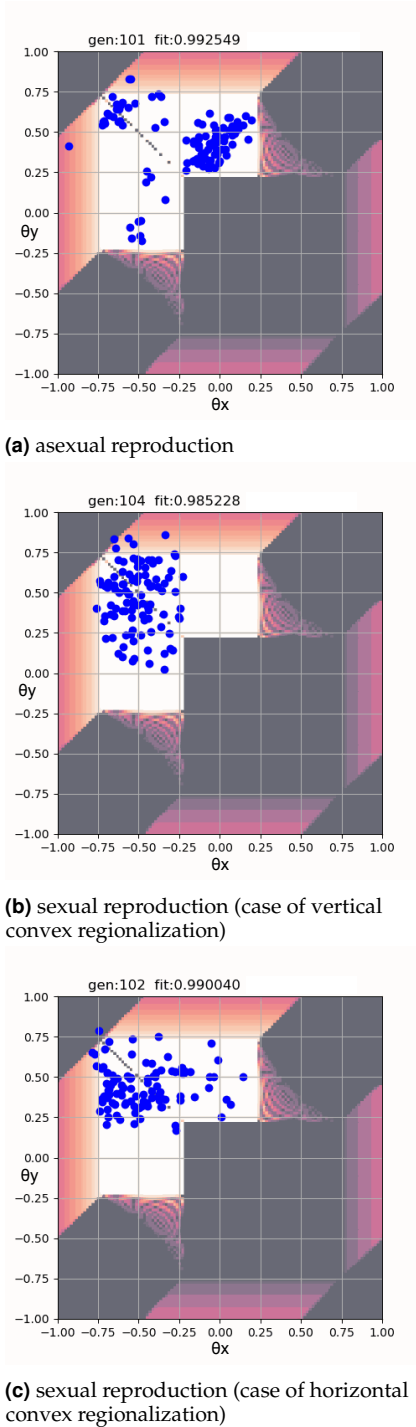

**Figure 8** Comparison of the population distributions in two rectangular fitness landscapes with X ONLY ( $w(x,y) = x$ ) fitness during (a) asexual reproduction (mutation only) and (b,c) sexual reproduction. The population branched into two cases, (b) and (c), which differ in each run of the evolution simulation. The initial expression was chosen as  $(x_0, y_0) = (0.18, 0.18)$ . The mutation rate was set at 0.1. "gen:" number is the generation number and "fit:" number is the average fitness of the population.

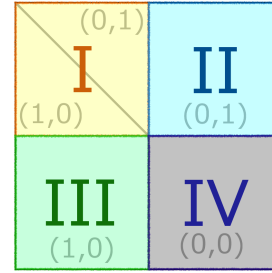

**Figure 9** Partition of L-SHAPE fitness landscape. Regions I, II, and III support the highest fitness, while fitness is lost in region IV. Values with brackets like (1,0) shows the stable expression levels of  $x$  and  $y$ .

scapes according to possible Boolean fitness functions. Characteristic landscapes including TWO RECTANGLES with the two optimal regions, L-SHAPE and ONE BAND, were obtained. As a result of evolution during sexual reproduction, the population becomes restricted to the convex region, leading in speciation.

To characterize the genetic changes in the gene regulatory matrix, a pair of continuous parameters  $\Theta = (\theta_x, \theta_y)$  was introduced and the relationship between genotype and phenotype was characterized to examine how these relationships are associated with fitness and genome distribution. Several studies have discussed how the genotype-phenotype-fitness relationship affects GRN dynamics (Hether and Hohenlohe (2014); Friedlander et al. (2017); Schiffman and Ralph (2022)). However, these analyses were restricted to a specific level. For instance, genotype to phenotype in Hether and Hohenlohe (2014), while a complete analysis of GRN dynamics has not been performed. We conducted a comprehensive analysis of the genotype-phenotype-fitness-distribution relationship. Furthermore, our results improve our understanding of how sexual reproduction changes population distribution or leads to speciation-like events in the fitness landscape, which requires a global landscape structure.

This study demonstrated that sexual reproduction limits populations only in a restricted, convex set in the maximum fitness regions (convex regionalization). The population was restricted to horizontal or vertical rectangular regions in the L-SHAPE landscape. In the TWO RECTANGLES landscape, the population was limited to one of the two separate high-fitness regions, which led to speciation. In the L-SHAPE landscape, complete speciation was not achieved, but convex regionalization led to two distinct population distributions, as in speciation.

When discussing the effects of multiple gene interactions, epistasis is often adopted. Epistasis is defined as a nonlinear change in fitness with multiple mutations. When the fitness change is lower or higher than the addition of changes in multiple mutations, it is called negative or positive epistasis, respectively. Epistasis is applied to local fitness changes, which benefits the study of the effects of relatively small mutations. In contrast, the fitness landscape provides global information on the fitness. This study showed that such information is essential for studying changes in population distribution, robustness of sexual reproduction, and speciation.



1 The method and results presented in this study can be used  
2 to solve other network related problems. First, the genotype  
3 parameter  $\Theta$  may be used for evolution in other Boolean net-  
4 work systems such as machine learning and social or ecological  
5 networks(Raimundo *et al.* (2018); Saavedra *et al.* (2007); Shizuka  
6 and McDonald (2015); Sinha *et al.* (2022); Gordon (2014)). It can  
7 also be applied to a system that interacts with a steep sigmoid  
8 function. Here, the threshold  $\zeta = 0.5$  was used for simplicity and  
9 symmetry, but even if the threshold for each genes is changed,  
10  $\Theta$  can be used because the dynamics equivalent to this study  
11 were obtained by the transformation of variables, even though  
12 the classification of dynamics was more complex. In addition,  $\Theta$   
13 can be extended to systems with more than two ( $N$ ) genes. In  
14 this case, the  $\Theta$  space had  $N(N - 1)$  dimensions, which made it  
15 more difficult to obtain a global fitness landscape. However, the  
16 fixed points and their stability can be evaluated according to the  
17 value of  $\Theta$ . The method of the present study can be applied by  
18 maintaining some  $\Theta$  values within a certain range. For instance,  
19 the present results can be extended to a system of multiple pairs  
20 of corresponding genes. In general, by introducing network  
21 modules (network motifs Alon (2019)), the application of this  
22 method is straightforward.

23 In conclusion, our global analysis of GRNs based on  $\Theta$  val-  
24 ues and the characterized fitness landscape contributes to the  
25 comprehensive understanding of GRN evolution, particularly  
26 convex regionalization associated with sexual reproduction and  
27 resultant speciation.

## 28 Acknowledgments

29 The authors would like to thank Tetsuhiro Hatakeyama, Yuichi  
30 Wakamoto, Naoki Irie, Akira Sasaki, and Shuji Ishihara for  
31 their stimulating discussions and Hideki Innan and Takahiro  
32 Sakamoto for providing information about genetics.

## 33 Funding

34 This research was partially supported by a Grant-in-Aid for  
35 Scientific Research (A) 431 (20H00123) and a Grant-in-Aid for  
36 Scientific Research on Innovative Areas (17H06386) from the  
37 Ministry of Education, Culture, Sports, Science, and Technology  
38 (MEXT) of Japan.

## 39 Conflicts of interest

40 The authors declare that they have no conflicts of interest.

## 41 Literature cited

42 Alon U. 2019. *An introduction to systems biology: design principles*  
43 *of biological circuits*. CRC press.  
44 Ayroles JF, Buchanan SM, O'Leary C, Skutt-Kakaria K, Grenier  
45 JK, Clark AG, Hartl DL, De Bivort BL. 2015. Behavioral id-  
46 iosyncrasy reveals genetic control of phenotypic variability.  
47 *Proceedings of the National Academy of Sciences*. 112:6706–  
48 6711.  
49 Azevedo RB, Lohaus R, Srinivasan S, Dang KK, Burch CL. 2006.  
50 Sexual reproduction selects for robustness and negative epis-  
51 tasis in artificial gene networks. *Nature*. 440:87–90.  
52 Bateson W. 1909. Heredity and variation in modern lights. Dar-  
53 win and modern science. .  
54 Chapal M, Mintzer S, Brodsky S, Carmi M, Barkai N. 2019. Re-  
55 solving noise-control conflict by gene duplication. *PLoS biol-*  
56 *ogy*. 17:e3000289.

Cubillos FA, Stegle O, Grondin C, Canut M, Tisné S, Gy I, Loudet 57  
O. 2014. Extensive cis-regulatory variation robust to environ- 58  
mental perturbation in arabidopsis. *The Plant Cell*. 26:4298– 59  
4310. 60  
Cuypers TD, Rutten JP, Hogeweg P. 2017. Evolution of evolv- 61  
ability and phenotypic plasticity in virtual cells. *BMC evolu-* 62  
*tionary biology*. 17:1–16. 63  
Dobzhansky T. 1936. Studies on hybrid sterility. ii. localization 64  
of sterility factors in drosophila pseudoobscura hybrids. *Ge-* 65  
*netics*. 21:113. 66  
Dobzhansky T. 1937. Genetic nature of species differences. *The* 67  
*American Naturalist*. 71:404–420. 68  
Friedlander T, Prizak R, Barton NH, Tkačik G. 2017. Evolution 69  
of new regulatory functions on biophysically realistic fitness 70  
landscapes. *Nature communications*. 8:1–11. 71  
Furusawa C, Suzuki T, Kashiwagi A, Yomo T, Kaneko K. 2005. 72  
Ubiquity of log-normal distributions in intra-cellular reaction 73  
dynamics. *Biophysics*. 1:25–31. 74  
Glass L, Kauffman SA. 1973. The logical analysis of continuous, 75  
non-linear biochemical control networks. *Journal of theoretical* 76  
*Biology*. 39:103–129. 77  
Gordon DM. 2014. The ecology of collective behavior. *PLoS* 78  
*biology*. 12:e1001805. 79  
Hether TD, Hohenlohe PA. 2014. Genetic regulatory network mo- 80  
tifs constrain adaptation through curvature in the landscape 81  
of mutational (co) variance. *Evolution*. 68:950–964. 82  
Ho WC, Zhang J. 2016. Adaptive genetic robustness of es- 83  
cherichia coli metabolic fluxes. *Molecular biology and evolu-* 84  
*tion*. 33:1164–1176. 85  
Kaneko K. 2006. *Life: an introduction to complex systems biology*. 86  
Springer. 87  
Kaneko K. 2007. Evolution of robustness to noise and mutation 88  
in gene expression dynamics. *PLoS One*. 2:e434. 89  
Kaneko T, Kikuchi M. 2020. Evolution enhances the mutational 90  
robustness and suppresses emergence of a new phenotype. 91  
*arXiv preprint arXiv:2012.03030*. . 92  
Kim KJ, Fernandes VM. 2009. Effects of ploidy and recombina- 93  
tion on evolution of robustness in a model of the segment 94  
polarity network. *PLoS Comput Biol*. 5:e1000296. 95  
Luscombe NM, Babu MM, Yu H, Snyder M, Teichmann SA, 96  
Gerstein M. 2004. Genomic analysis of regulatory network 97  
dynamics reveals large topological changes. *Nature*. 431:308– 98  
312. 99  
Martin OC, Wagner A. 2009. Effects of recombination on complex 100  
regulatory circuits. *Genetics*. 183:673–684. 101  
Miller M, Song Q, Shi X, Juenger TE, Chen ZJ. 2015. Natural 102  
variation in timing of stress-responsive gene expression pre- 103  
dicts heterosis in intraspecific hybrids of arabidopsis. *Nature* 104  
*communications*. 6:1–13. 105  
Mjolsness E, Sharp DH, Reinitz J. 1991. A connectionist model 106  
of development. *Journal of theoretical Biology*. 152:429–453. 107  
Muller H. 1942. Isolating mechanisms, evolution, and tempera- 108  
ture. In: . volume 6. pp. 71–125. 109  
Muller HJ. 1940. Bearing of the drosophila work on systematics. 110  
*The new systematics*,. pp. 185–268. 111  
Nagata S, Kikuchi M. 2020. Emergence of cooperative bistability 112  
and robustness of gene regulatory networks. *PLoS computa-* 113  
*tional biology*. 16:e1007969. 114  
Neyfakh AA, Baranova NN, Mizrokhi LJ. 2006. A system for 115  
studying evolution of life-like virtual organisms. *Biology Di-* 116  
*rect*. 1:1–21. 117  
Okubo K, Kaneko K. 2021a. Evolution of dominance in gene 118

## 10 Comprehensive analysis of gene networks

- 1 expression pattern associated with phenotypic robustness.  
2 BMC Ecology and Evolution. 21:1–14.
- 3 Okubo K, Kaneko K. 2021b. Heterosis of fitness and phenotypic  
4 variance in the evolution of diploid gene regulatory network.  
5 bioRxiv. .
- 6 Omholt SW, Plahte E, Øyehaug L, Xiang K. 2000. Gene reg-  
7 ulatory networks generating the phenomena of additivity,  
8 dominance and epistasis. Genetics. 155:969–980.
- 9 Orlenko A, Chi PB, Liberles DA. 2017. Characterizing the roles  
10 of changing population size and selection on the evolution of  
11 flux control in metabolic pathways. BMC evolutionary biology.  
12 17:1–16.
- 13 Orlenko A, Teufel AI, Chi PB, Liberles DA. 2016. Selection  
14 on metabolic pathway function in the presence of mutation-  
15 selection-drift balance leads to rate-limiting steps that are not  
16 evolutionarily stable. Biology direct. 11:1–14.
- 17 Ou J, Yamada T, Nagahisa K, Hirasawa T, Furusawa C, Yomo  
18 T, Shimizu H. 2008. Dynamic change in promoter activation  
19 during lysine biosynthesis in escherichia coli cells. Molecular  
20 biosystems. 4:128–134.
- 21 Raimundo RL, Guimaraes Jr PR, Evans DM. 2018. Adaptive net-  
22 works for restoration ecology. Trends in Ecology & Evolution.  
23 33:664–675.
- 24 Saavedra S, Efstathiou J, Reed-Tsochas F. 2007. Identifying the  
25 underlying structure and dynamic interactions in a voting  
26 network. Physica A: Statistical Mechanics and its Applications.  
27 377:672–688.
- 28 Salazar-Ciudad I, Garcia-Fernández J, Solé RV. 2000. Gene  
29 networks capable of pattern formation: from induction to  
30 reaction–diffusion. Journal of theoretical biology. 205:587–603.
- 31 Salazar-Ciudad I, Newman S, Solé R. 2001. Phenotypic and dy-  
32 namical transitions in model genetic networks i. emergence of  
33 patterns and genotype-phenotype relationships. Evolution &  
34 development. 3:84–94.
- 35 Schiffman JS, Ralph PL. 2022. System drift and speciation. Evo-  
36 lution. 76:236–251.
- 37 Shizuka D, McDonald DB. 2015. The network motif architec-  
38 ture of dominance hierarchies. Journal of the Royal Society  
39 Interface. 12:20150080.
- 40 Sinha S, Bhattacharya S, Roy S. 2022. Impact of second-order  
41 network motif on online social networks. The Journal of Su-  
42 percomputing. 78:5450–5478.
- 43 Soyer OS, Bonhoeffer S. 2006. Evolution of complexity in sig-  
44 naling pathways. Proceedings of the National Academy of  
45 Sciences. 103:16337–16342.
- 46 Swain PS, Elowitz MB, Siggia ED. 2002. Intrinsic and extrinsic  
47 contributions to stochasticity in gene expression. Proceedings  
48 of the National Academy of Sciences. 99:12795–12800.
- 49 Wagner A. 2013. *Robustness and evolvability in living systems*. vol-  
50 ume 24. Princeton university press.
- 51 Yubero P, Manrubia S, Aguirre J. 2017. The space of genotypes  
52 is a network of networks: implications for evolutionary and  
53 extinction dynamics. Scientific reports. 7:1–12.
